# Supplementary material for: Modelling the Compaction Step of a Platform Direct Compression Process
Source: MDPI journal article supplement (doi:10.3390/pharmaceutics14040695), 2022-03-23
Supplement: s1 [file s1]

# Supplementary Materials: Modelling the Compaction Step of a Platform Direct Compression Process

Raghu V. G. Peddapatla, Conor Slevin, Gerard Sheridan, Caoimhe Beirne, Shrikant Swaminathan, Ivan Browning, Clare O'Reilly, Zelalem A. Worku, David Egan, Stephen Sheehan and Abina M. Crean

**Table S1.** Key technical specification of tablet press in this study with specific type of tooling.

| Parameters                                           | KG RoTab                           | Fette 1200i                        | GEA Modul P                                 |
|------------------------------------------------------|------------------------------------|------------------------------------|---------------------------------------------|
| No of punch stations                                 | 8                                  | 24                                 | 21                                          |
| Max tablet output per hour (TPH)                     | 19,200                             | 140,000                            | 140,000                                     |
| Fill weight control mechanism                        | Main compression force measurement | Main compression force measurement | Pre-compression displacement at equal force |
| Feed frame design (no. chambers)                     | 2 chambers                         | 3 chambers                         | 2 chambers                                  |
| Punch type                                           | D                                  | B                                  | B                                           |
| Punch Shape                                          | Shield (Triangular)                |                                    |                                             |
| Tip edge width (mm)                                  | 8.5                                |                                    |                                             |
| Perimeter of punch tip (mm)                          | 27.8                               |                                    |                                             |
| Cross sectional area of punch tip (mm <sup>2</sup> ) | 54.8                               |                                    |                                             |

**Table S2.** DoE run order of experiments for three different formulations on three tablet presses. The centre points are shown in bold.

| Runs      | Pre-Compression Force | Main Compression Force | Press Speed |
|-----------|-----------------------|------------------------|-------------|
| 1         | -1                    | -1                     | +1          |
| 2         | 1                     | 1                      | +1          |
| 3         | -1                    | 1                      | -1          |
| 4         | -1                    | 1                      | +1          |
| 5         | 1                     | -1                     | +1          |
| 6         | 0                     | -1                     | 0           |
| 7         | -1                    | -1                     | -1          |
| <b>8</b>  | <b>0</b>              | <b>0</b>               | <b>0</b>    |
| 9         | -1                    | 0                      | 0           |
| <b>10</b> | <b>0</b>              | <b>0</b>               | <b>0</b>    |
| 11        | 0                     | 0                      | +1          |
| 12        | 1                     | 1                      | -1          |
| 13        | 0                     | 1                      | 0           |
| 14        | 1                     | -1                     | -1          |
| 15        | 1                     | 0                      | 0           |
| 16        | 0                     | 0                      | -1          |

**Table S3.** Main compression force applied to achieve the target tablet porosities of 10%, 15% and 20% for each formulation on each tablet press.

| Tablet Press | Formulation | Target Porosity (%) | Main Compression Force (kN) |
|--------------|-------------|---------------------|-----------------------------|
| KG RoTab     | 1           | 10                  | 13.50                       |
|              |             | 15                  | 11.16                       |
|              |             | 20                  | 8.83                        |
|              | 2           | 10                  | 13.98                       |
|              |             | 15                  | 9.40                        |
|              |             | 20                  | 4.81                        |
|              | 3           | 10                  | 10.56                       |
|              |             | 15                  | 5.14                        |
|              |             | 20                  | 1.50                        |
| Fette 1200i  | 1           | 10                  | 15.65                       |
|              |             | 15                  | 13.39                       |
|              |             | 20                  | 11.12                       |
|              | 2           | 10                  | 15.71                       |
|              |             | 15                  | 13.08                       |
|              |             | 20                  | 10.45                       |
|              | 3           | 10                  | 13.60                       |
|              |             | 15                  | 9.86                        |
|              |             | 20                  | 6.12                        |
| GEA Modul P  | 1           | 10                  | 17.97                       |
|              |             | 15                  | 15.19                       |
|              |             | 20                  | 12.40                       |
|              | 2           | 10                  | 18.03                       |
|              |             | 15                  | 14.27                       |
|              |             | 20                  | 11.41                       |
|              | 3           | 10                  | 16.10                       |
|              |             | 15                  | 12.20                       |
|              |             | 20                  | 8.29                        |

**Table S4.** Process parameters used to validate the models.

| Tablet Press | Formulation | Main Compression Force (kN) | Pre compression Force (kN) | Tablet Press Speed (TPH) |
|--------------|-------------|-----------------------------|----------------------------|--------------------------|
| KG RoTab     | Plastic     | 6.86                        | 1                          | 14,400                   |
|              | Plastic     | 10.64                       | 1                          | 14,400                   |
|              | Elastic     | 6.9                         | 1                          | 14,400                   |
|              | Elastic     | 10.99                       | 1                          | 14,400                   |
|              | Brittle     | 7.14                        | 1                          | 14,400                   |
|              | Brittle     | 10.92                       | 1                          | 14,400                   |
| GEA Modul P  | Plastic     | 7.17                        | 1                          | 50,000                   |
|              | Plastic     | 11.35                       | 1                          | 50,000                   |
|              | Elastic     | 16.13                       | 1                          | 50,000                   |
|              | Elastic     | 19.18                       | 1                          | 50,000                   |
|              | Brittle     | 10.18                       | 1                          | 50,000                   |
|              | Brittle     | 15.60                       | 1                          | 50,000                   |

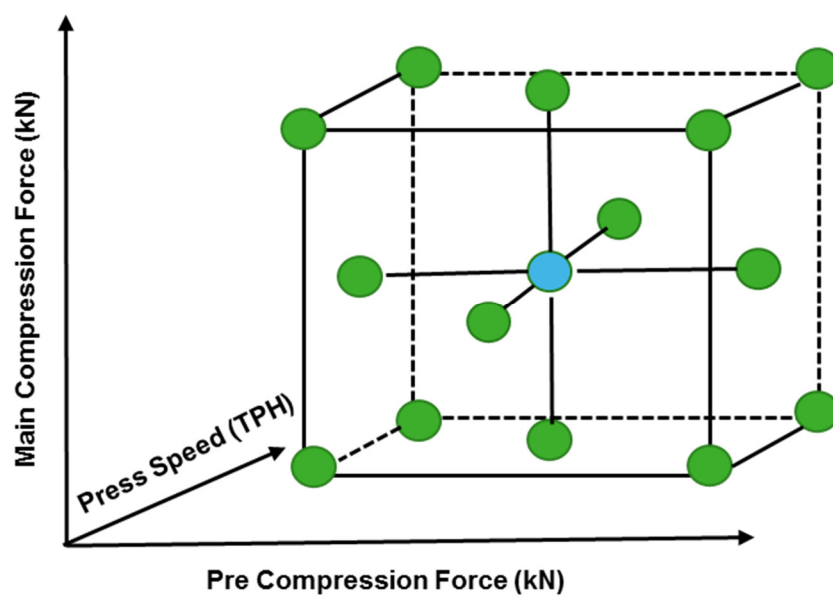

Figure S1. Full response surface design DoE with 14 runs (green) and 2 centre points (blue).
